# Supplementary material for: Concurrent Production of α- and β-Carotenes with Different Stoichiometries Displaying Diverse Antioxidative Activities via Lycopene Cyclases-Based Rational System
Source: MDPI journal article supplement (doi:10.3390/antiox11112267), 2022-11-17
Supplement: s1 [file s1]

## Supplementary Materials

Table S1. Primers used in this study

| Prime name      | Primer Sequence (5'-3')                         |
|-----------------|-------------------------------------------------|
| GlpF-F          | GTACCGGGCCCCCCTCGAGATGAGTCAAACATCAACCTTGAAAGG   |
| GlpF-R          | TGAAGAAGATGAACCTCCCAGCGAAGCTTTTTGTTC            |
| TeLCYE-F        | GCGGATCCGGAGGCGGATCTATGTCCATGCGTGCGGGC          |
| TeLCYE-R        | TCAGTGATGATGGTGATGGTGGATGGTCAGGTACGCTTTCAGC     |
| pBlueScript-F   | CACCATCACCATCATCACTGAGGATCCACTAGTTCTAGAGCGG     |
| pBlueScript-R   | CTCGAGGGGGGGGGCCCGGTACCCAATTCGCCCTATAGTGAGTCGTA |
| $\Delta$ GlpF-F | GTACCGGGCCCCCCTCGAGATGGTGAGCAAGGGCGAGGA         |
| $\Delta$ GlpF-R | TCCTCGCCCTTGCTCACCATCTCGAGGGGGGGGGCCCGGTAC      |
| CspA-F          | AGATCTCGATCCCGCGAAATCCGATTAATCATAAATATGA        |
| CspA-R          | GTGATGATGATGATGATGCACCTTTGTGATTTCATGGTGTAT      |
| pET-F           | CATCATCATCATCATCACAGCAGCGG                      |
| pET-R           | ATTTCGCGGGATCGAGATCTCGATCCTCTA                  |

Table S2. Primers for qRT-PCR

| Prime name | Sequence (5'-3')           |
|------------|----------------------------|
| 16SRNA-F   | CTGGTAGTCCACGCCGTAAAC      |
| 16SRNA-R   | GGCACATTCTCATCTCTGAAAACCTT |
| TeLCYB-F   | TCCTGTCTAGCCGTCTGTTCTG     |
| TeLCYB-R   | GGTGCCTTTCGCCATGATTCAAC    |
